# Supplementary material for: Smokeless Tobacco and Oral Cancer in South Asia: A Systematic Review with Meta-Analysis
Source: PubMed Central journal article supplement (PMC4109110; doi:10.1155/2014/394696), 2014-07-06
Supplement: 394696.f1.pdf [file 394696.f1.pdf]

**Supplementary table 1. Additional characteristics of the selected studies.**

| Study Reference | Author                  | Type of cancer                     | Sexes considered  | Study location | Type of Controls                           | Type of exposure                             | Follow up period |
|-----------------|-------------------------|------------------------------------|-------------------|----------------|--------------------------------------------|----------------------------------------------|------------------|
| 29              | Sankaranarayanan et al. | Floor of the mouth and base tongue | Males and females | Kerala         | Hospital controls                          | Smoking, smokeless tobacco and alcohol.      |                  |
| 30              | Sankaranarayanan et al. | Labial and buccal mucosa           | Males and females | Kerala         | Hospital controls                          | Smoking, smokeless tobacco and alcohol.      |                  |
| 31              | Sankaranarayanan et al. | Gingiva                            | Males and females | Kerala         | Hospital controls                          | Smoking, smokeless tobacco and alcohol.      |                  |
| 32              | Goud et al.             | Buccal cavity cancer.              | Males and females | Varnasi        | Two separate hospital based control groups | Different forms of smokeless tobacco.        |                  |
| 33              | Nandakumar et al.       | Oral cancer                        | Males and females | Bangalore      | Population based controls                  | Diet, smoking and chewing tobacco.           |                  |
| 34              | Rao et al.              | Oral cancer                        | Males             | Mumbai         | Hospital controls                          | Alcohol, smoking and smokeless tobacco.      |                  |
| 35              | Khan et al.             | Oral cancer                        | Males and females | Karachi        | Hospital controls                          | Lifestyle risk factors                       |                  |
| 36              | Wasnik et al.           | Oral and pharyngeal cancers        | Males and females | Nagpur         | Hospital controls                          | Smoking, chewing and occupational exposures. |                  |

|    |                  |                                         |                   |                                |                                                  |                                                                    |  |
|----|------------------|-----------------------------------------|-------------------|--------------------------------|--------------------------------------------------|--------------------------------------------------------------------|--|
| 37 | Dikshit et al.   | Oropharyngeal , oral and lung cancer    | Males             | Bhopal                         | Population based controls                        | Smoking and smokeless tobacco                                      |  |
| 38 | Merchant et al.  | Oral cancer                             | Males and females | Karachi                        | Hospital controls                                | Betel quid with and without tobacco                                |  |
| 39 | Balaram et al.   | Oral cancer                             | Males and females | Bangalore, Madras, Trivandrum. | Hospital controls                                | Smoking, Smokeless tobacco, alcohol use and occupational exposures |  |
| 40 | Znaor et al.     | Oral, esophageal and pharyngeal cancers | Males             | Trivandrum                     | hospital controls                                | Smoking, chewing tobacco and alcohol.                              |  |
| 41 | Subapriya et al. | Oral squamous cell carcinoma            | Males and females | Chidambaram                    | Hospital controls                                | Various lifestyle risk factors                                     |  |
| 42 | Gangane et al.   | Oral cancer                             | Males and females | Sevagram                       | Hospital controls                                | Smoking, smokeless tobacco, diet and alcohol use.                  |  |
| 43 | Basu et al.      | Head and neck cancer                    | Males and females | Kolkatta                       | Hospital controls                                | Smoking and smokeless tobacco                                      |  |
| 44 | Muwonge et al.   | Oral cancer                             | Males and females | Trivandrum                     | Controls taken from within the Trivandrum cohort | Smoking, smokeless tobacco and alcohol.                            |  |

|    |                    |                  |                   |         |                   |                                         |                      |
|----|--------------------|------------------|-------------------|---------|-------------------|-----------------------------------------|----------------------|
| 45 | Jayalekshmi et al. | Oral cancer      | Females only      | Kerala  | N/A               | Tobacco chewing                         | Eight years          |
| 46 | Jayalekshmi et al. | Oral cancer      | Males only        | Kerala  | N/A               | Tobacco chewing and bidi smoking        | Eight years          |
| 47 | Pednekar et al.    | Multiple cancers | Males and females | Mumbai  | N/A               | Smokeless tobacco                       | 649,228 person years |
| 48 | Madani et al.      | Oral cancer      | Males and females | Pune    | Hospital controls | Smoking, smokeless tobacco and alcohol. |                      |
| 49 | Ray et al.         | Oral cancer      | Males and females | Kolkata | Hospital controls | Smoking, smokeless tobacco and alcohol. |                      |
